# Supplementary material for: Thermodynamic and kinetic behaviour of [Pt(2-methylthiomethylpyridine)(OH2)2]2+
Source: Royal Society of Chemistry journal article supplement (doi:10.1039/c1dt11453k), 2011-11-01
Supplement: c1dt11453k.pdf [file c1dt11453k.pdf]

### Electronic Supplementary Information

## Thermodynamic and Kinetic Behaviour of $[\text{Pt}(2\text{-methylthiomethylpyridine})(\text{OH}_2)_2]^{2+}$

Stephanie Hochreuther, Sharanappa T. Nandibewoor, Ralph Puchta and

Rudi van Eldik\*

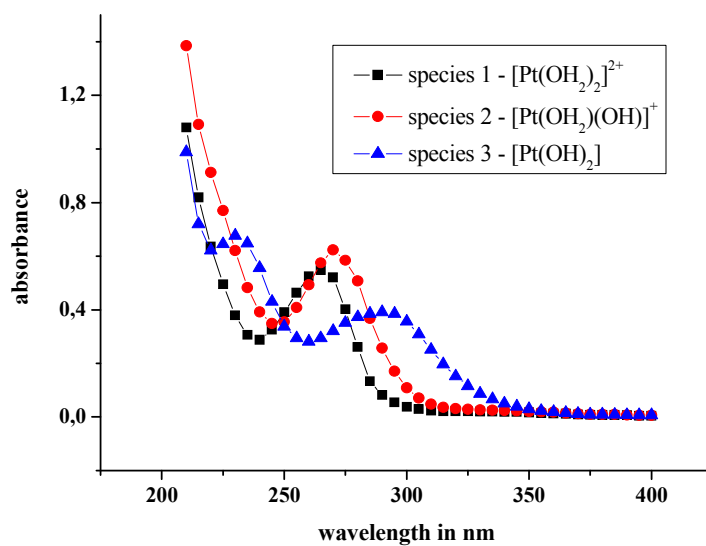

**Fig. SI 1** Calculated absorbance traces for the species 1 – 3 for the **Pt(mtp)** complex as a function of pH.

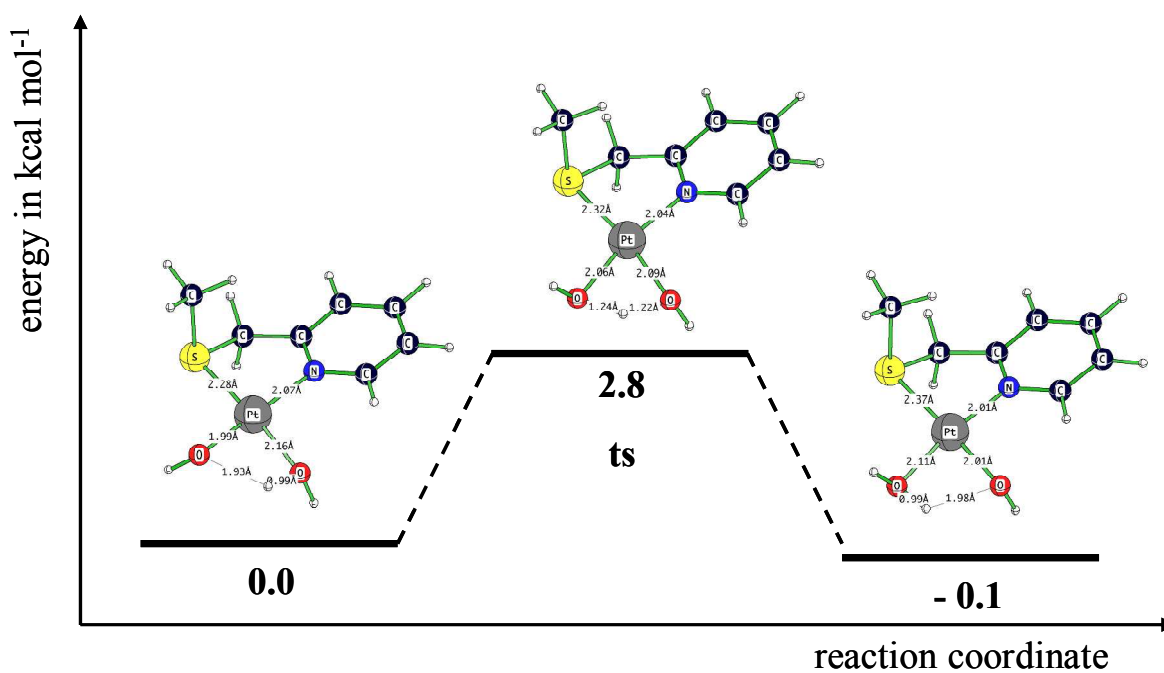

**Fig. SI 2** Calculated energy (B3LYP/LANL2DZp) profile for intramolecular proton transfer of the mono-deprotonated **Pt(mtp)** complex with the transition state (ts).

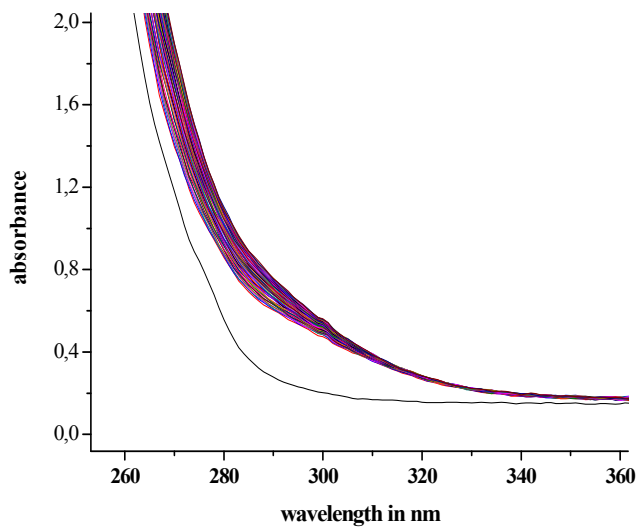

**Fig. SI 3** UV-vis spectra recorded for the reaction of 0.125 mM **Pt(mtp)** with 5 mM dmtu at pH 2 ( $I = 0.01$  M triflic acid) and 25 °C.

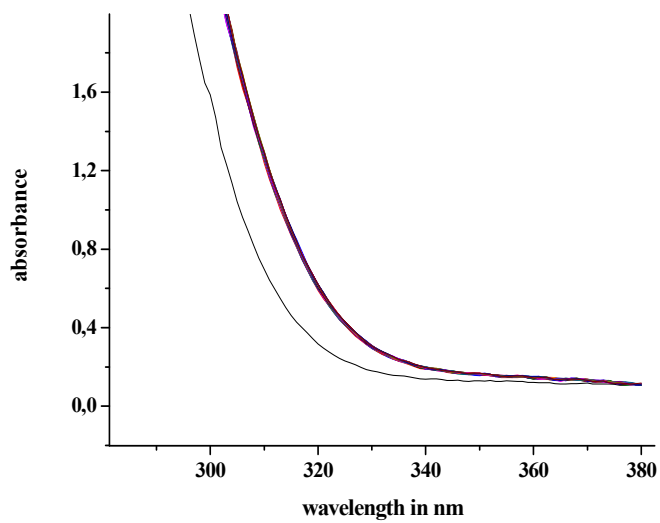

**Fig. SI 4** UV-vis spectra recorded for the reaction of 0.125 mM **Pt(mtp)** with 5 mM tmtu at pH 2 ( $I = 0.01$  M triflic acid) and 25 °C.

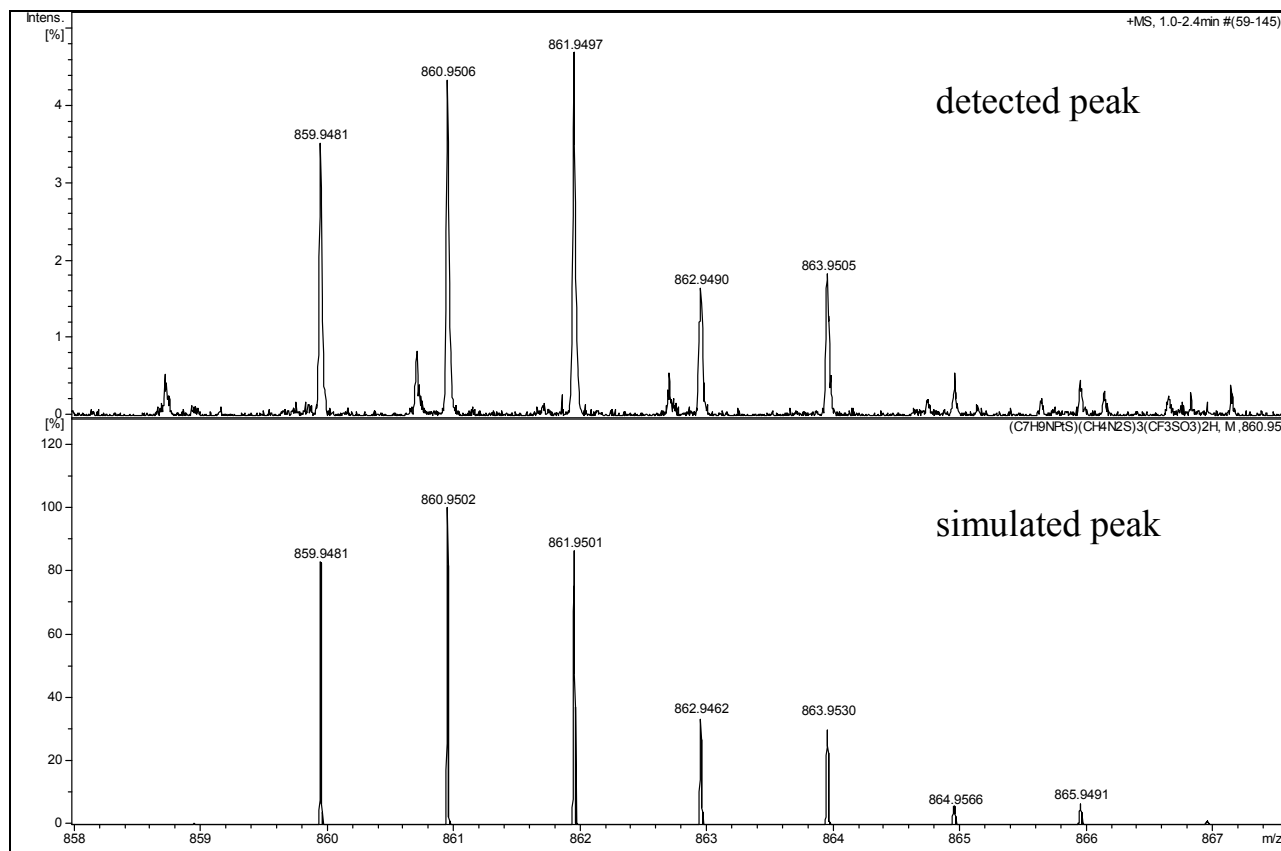

**Fig. SI 5** Isotopic pattern and simulation of the peak around  $m/z = 861$  ( $M = 860.95 \text{ g mol}^{-1}$ ), which belongs to the **Pt(mtp)** complex that includes three thiourea ligands (at pH 2).

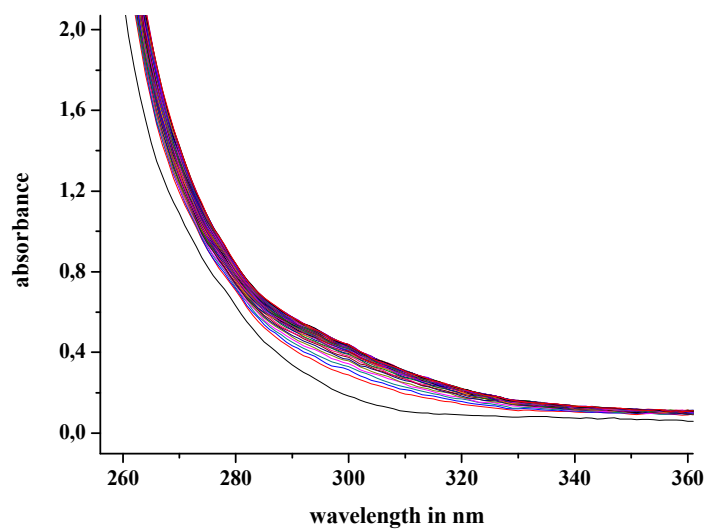

**Fig. SI 6** UV-vis spectra recorded for the reaction of 0.125 mM **Pt(mtp)** with 5 mM dmtu at pH 4.75 ( $I = 0.1$  M acetate buffer solution) and 25 °C.

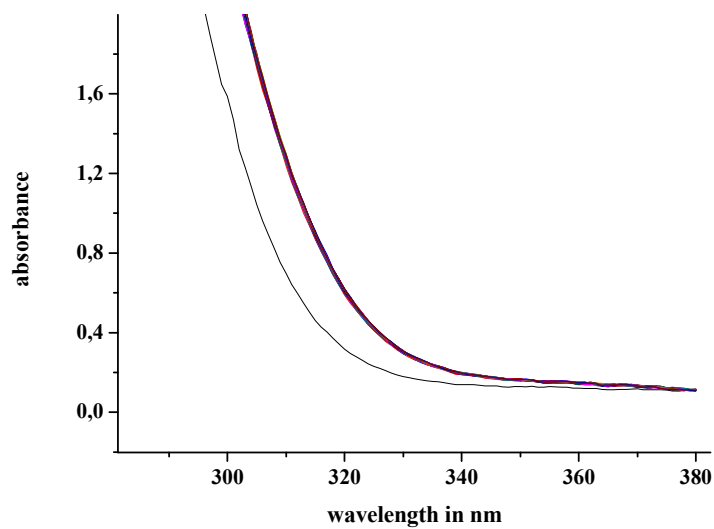

**Fig. SI 7** UV-vis spectra recorded for the reaction of 0.125 mM **Pt(mtp)** with 5 mM tmtu at pH 4.75 ( $I = 0.1$  M acetate buffer solution) and 25 °C.

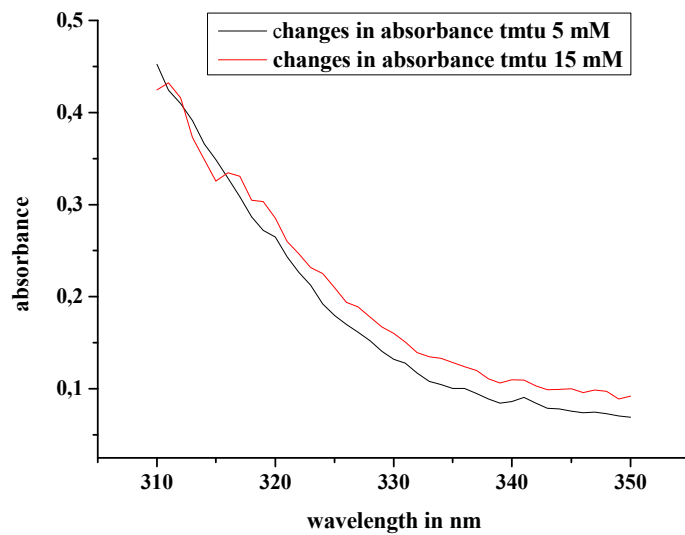

**Fig. SI 8** Changes in absorbance during the reaction of 0.125 mM **Pt(mtp)** with 5 mM tu (black) and 15 mM tu (red).



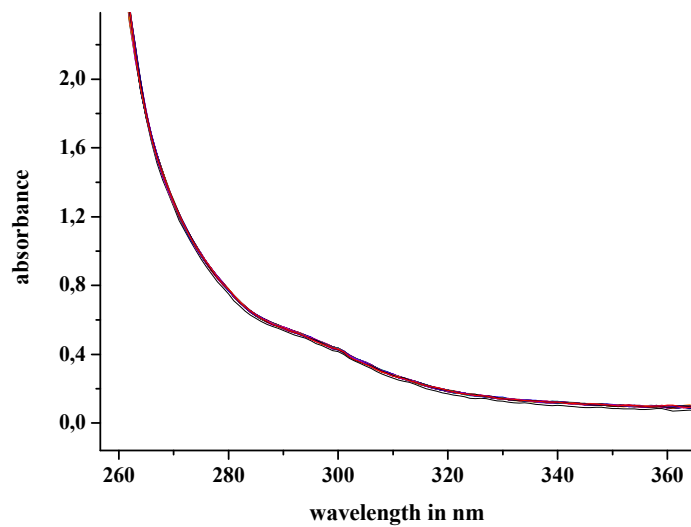

**Fig. SI 9** UV-vis spectra recorded for the reaction of 0.125 mM **Pt(mtp)** with 5 mM tu at pH 7.4 ( $I = 0.1$  M TRIS buffer) and 25 °C.

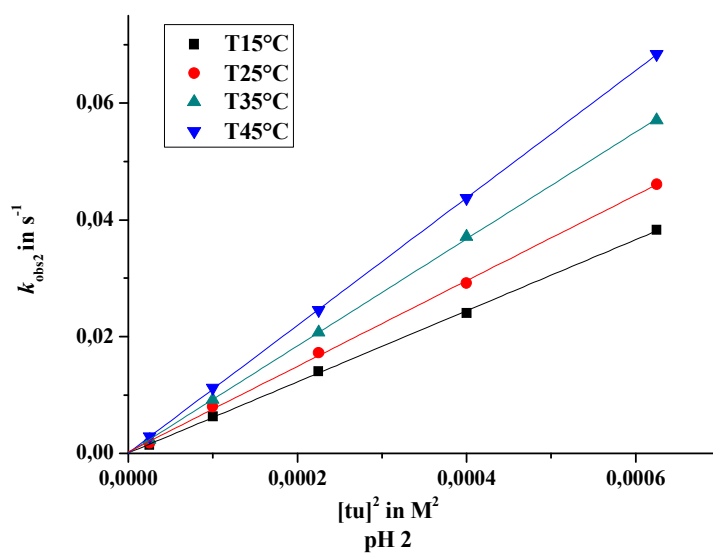

**Fig. SI 10** Plots of  $k_{\text{obs}2}$  vs  $[\text{tu}]^2$  for different temperatures at pH 2 ( $I = 0.01$  M triflic acid).

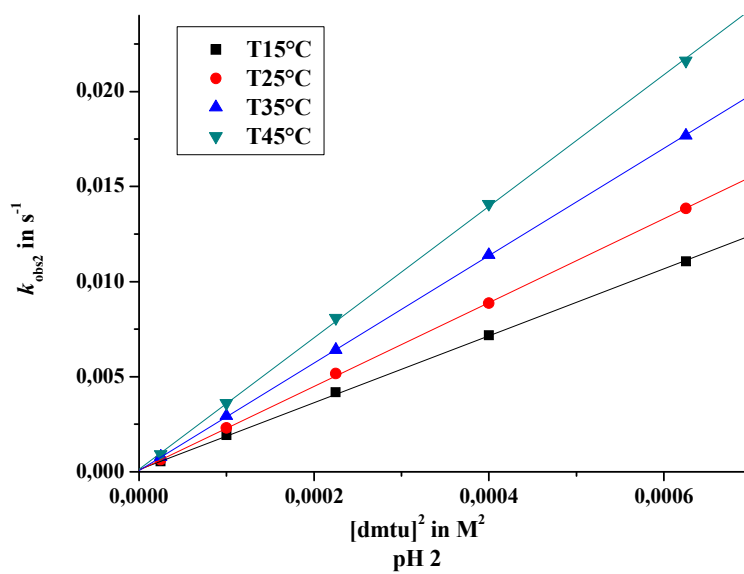

**Fig. SI 11** Plots of  $k_{\text{obs}2}$  vs  $[\text{dmtu}]^2$  for different temperatures at pH 2 ( $I = 0.01$  M triflic acid).

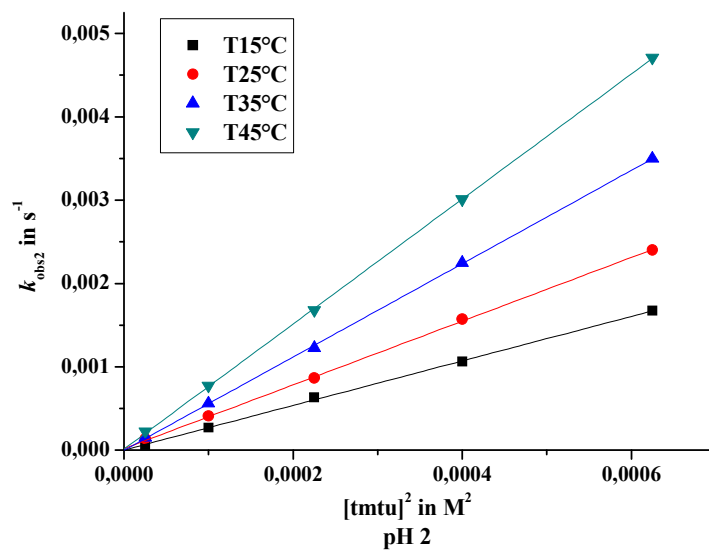

**Fig. SI 12** Plots of  $k_{\text{obs}2}$  vs  $[\text{tmtu}]^2$  for different temperatures at pH 2 ( $I = 0.01$  M triflic acid).

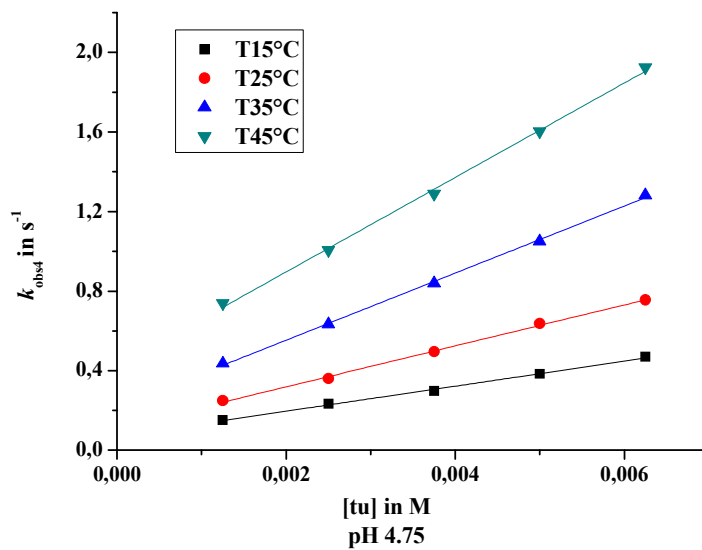

**Fig. SI 13** Plots of  $k_{obs4}$  vs tu concentration for different temperatures at pH 4.75 ( $I = 0.1$  M acetate buffer).

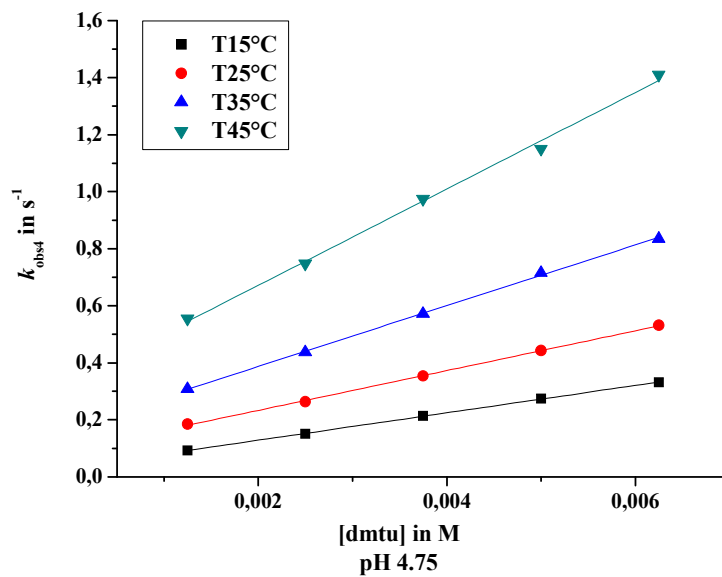

**Fig. SI 14** Plots of  $k_{obs4}$  vs dmtu concentration for different temperatures at pH 4.75 ( $I = 0.1$  M acetate buffer).

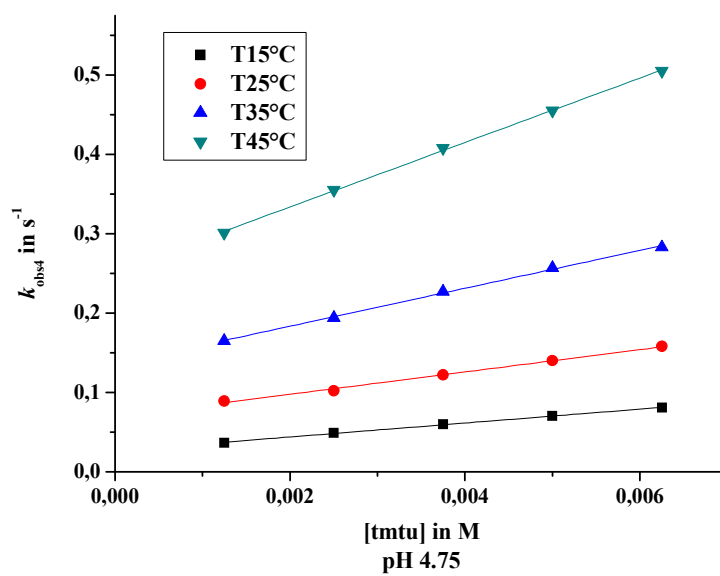

**Fig. SI 15** Plots of  $k_{\text{obs4}}$  vs tmtu concentration for different temperatures at pH 4.75 ( $I = 0.1$  M acetate buffer).

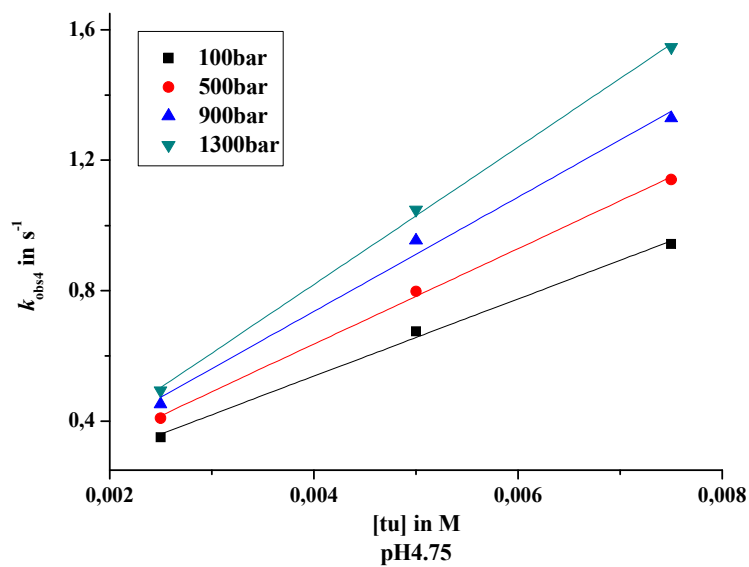

**Fig. SI 16** Plots of  $k_{\text{obs}4}$  vs  $[\text{tu}]$  concentration for different pressures at pH 4.75 ( $I = 0.1$  M acetate buffer) and 25 °C.



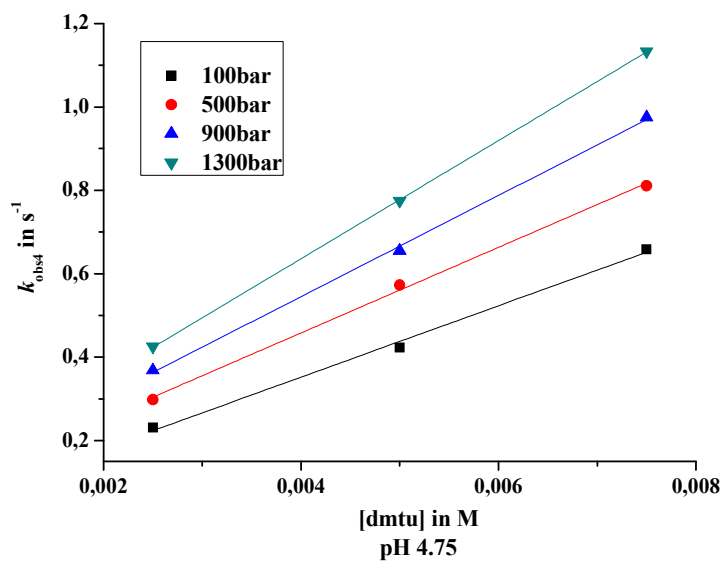

**Fig. SI 17** Plots of  $k_{obs4}$  vs dmtu concentration for different pressures at pH 4.75 ( $I = 0.1$  M acetate buffer) and 25 °C.

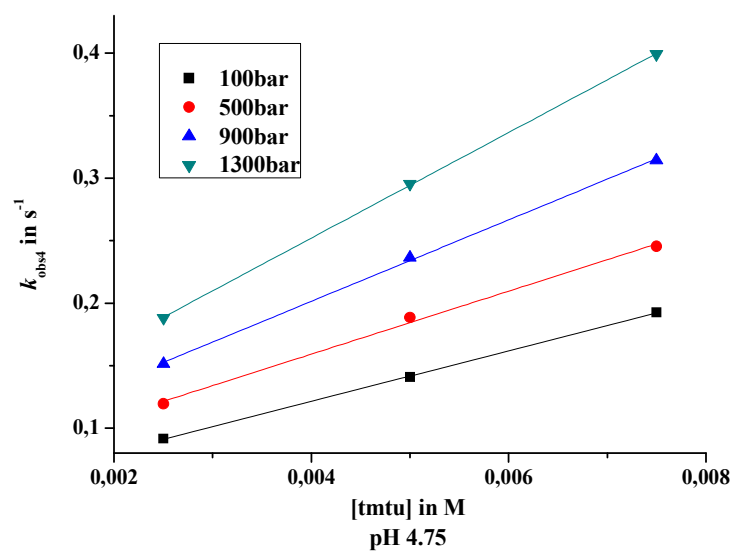

**Fig. SI 18** Plots of  $k_{obs4}$  vs tmtu concentration for different pressures at pH 4.75 ( $I = 0.1$  M acetate buffer) and 25 °C.

**Table SI 1** Selected wavelengths for the successive substitution reactions of all three nucleophiles and different pH values.

|                            | <b>pH</b> | <b>tu</b> | <b>dmtu</b> | <b>tmtu</b> |
|----------------------------|-----------|-----------|-------------|-------------|
| <b>1<sup>st</sup> step</b> | 2         | 310 nm    | 310 nm      | 310 nm      |
|                            | 4.75      | 310 nm    | 310 nm      | 320 nm      |
| <b>2<sup>nd</sup> step</b> | 2         | 290 nm    | 290 nm      | 320 nm      |
|                            | 4.75      | 310 nm    | 310 nm      | 320 nm      |

**Table SI 2** Average observed rate constants,  $k_{\text{obs1}}$ , for the reaction of 0.125 mM **Pt(mtp)** with different nucleophiles at pH 2 ( $I = 0.01$  M triflic acid) and 25 °C.

| Nucleophile | <b>tu</b>                            | <b>dmtu</b>       | <b>tmtu</b>       |
|-------------|--------------------------------------|-------------------|-------------------|
| [Nu] in mM  | $k_{\text{obs1}}$ in $\text{s}^{-1}$ |                   |                   |
| 1.25        | $0.764 \pm 0.008$                    | $0.613 \pm 0.006$ | $0.184 \pm 0.006$ |
| 2.50        | $1.62 \pm 0.03$                      | $1.246 \pm 0.008$ | $0.405 \pm 0.004$ |
| 3.75        | $2.47 \pm 0.03$                      | $1.93 \pm 0.05$   | $0.63 \pm 0.02$   |
| 5.00        | $3.20 \pm 0.02$                      | $2.56 \pm 0.04$   | $0.80 \pm 0.02$   |
| 6.25        | $3.92 \pm 0.02$                      | $3.13 \pm 0.02$   | $1.03 \pm 0.03$   |

**Table SI 3** Average observed rate constants,  $k_{\text{obs2}}$ , for the reaction of 0.125 mM **Pt(mtp)** with different nucleophiles at pH 2 ( $I = 0.01$  M triflic acid) and 25 °C.

| Nucleophile | <b>tu</b>                                 | <b>dmtu</b>       | <b>tmtu</b>       |
|-------------|-------------------------------------------|-------------------|-------------------|
| [Nu] in mM  | $10^2 k_{\text{obs2}}$ in $\text{s}^{-1}$ |                   |                   |
| 5.00        | $0.18 \pm 0.03$                           | $0.064 \pm 0.006$ | $0.013 \pm 0.007$ |
| 10.00       | $0.802 \pm 0.009$                         | $0.230 \pm 0.002$ | $0.041 \pm 0.004$ |
| 15.00       | $1.724 \pm 0.005$                         | $0.516 \pm 0.003$ | $0.086 \pm 0.006$ |
| 20.00       | $2.919 \pm 0.003$                         | $0.886 \pm 0.005$ | $0.16 \pm 0.01$   |
| 25.00       | $4.608 \pm 0.005$                         | $1.385 \pm 0.002$ | $0.240 \pm 0.005$ |

**Table SI 4** Average observed rate constants,  $k_{\text{obs4}}$ , for the reaction of 0.125 mM **Pt(mtp)** with different nucleophiles at pH 4.75 ( $I = 0.1$  M acetate buffer) and 25 °C.

| Nucleophile | <b>tu</b>                            | <b>dmtu</b>       | <b>tmtu</b>       |
|-------------|--------------------------------------|-------------------|-------------------|
| [Nu] in mM  | $k_{\text{obs4}}$ in $\text{s}^{-1}$ |                   |                   |
| 1.25        | $0.231 \pm 0.003$                    | $0.18 \pm 0.02$   | $0.089 \pm 0.006$ |
| 2.50        | $0.359 \pm 0.003$                    | $0.263 \pm 0.002$ | $0.102 \pm 0.008$ |
| 3.75        | $0.495 \pm 0.001$                    | $0.353 \pm 0.005$ | $0.122 \pm 0.002$ |
| 5.00        | $0.636 \pm 0.007$                    | $0.442 \pm 0.005$ | $0.140 \pm 0.002$ |
| 6.25        | $0.755 \pm 0.002$                    | $0.53 \pm 0.01$   | $0.16 \pm 0.01$   |

**Table SI 5** Average observed rate constants,  $k_{\text{obs}}$ , for the reaction of 0.125 mM **Pt(mtp)** with different nucleophiles at pH 4.75 ( $I = 0.1$  M acetate buffer) and 25 °C.

| Nucleophile | <b>tu</b>                                | <b>dmtu</b>       | <b>tmtu</b>       |
|-------------|------------------------------------------|-------------------|-------------------|
| [Nu] in mM  | $10^2 k_{\text{obs}}$ in $\text{s}^{-1}$ |                   |                   |
| 1.25        | $0.231 \pm 0.002$                        | $0.141 \pm 0.006$ | $0.011 \pm 0.002$ |
| 2.50        | $0.461 \pm 0.003$                        | $0.293 \pm 0.002$ | $0.023 \pm 0.008$ |
| 3.75        | $0.73 \pm 0.03$                          | $0.436 \pm 0.003$ | $0.036 \pm 0.002$ |
| 5.00        | $0.961 \pm 0.002$                        | $0.586 \pm 0.009$ | $0.050 \pm 0.001$ |
| 6.25        | $1.191 \pm 0.001$                        | $0.747 \pm 0.001$ | $0.061 \pm 0.003$ |

**Table SI 6** Average observed rate constants,  $k_{\text{obs1}}$ , for the reaction of 0.125 mM **Pt(mtp)** with different nucleophiles (3.75 mM) at different temperatures and pH 2 ( $I = 0.01$  M triflic acid).

| Nucleophile | <b>tu</b>                            | <b>dmtu</b>       | <b>tmtu</b>       |
|-------------|--------------------------------------|-------------------|-------------------|
| T in K      | $k_{\text{obs1}}$ in $\text{s}^{-1}$ |                   |                   |
| 288.15      | $1.39 \pm 0.01$                      | $1.197 \pm 0.006$ | $0.32 \pm 0.01$   |
| 298.15      | $2.468 \pm 0.007$                    | $1.928 \pm 0.004$ | $0.63 \pm 0.04$   |
| 308.15      | $3.607 \pm 0.006$                    | $2.96 \pm 0.03$   | $1.023 \pm 0.006$ |
| 318.15      | $5.79 \pm 0.02$                      | $4.81 \pm 0.05$   | $1.679 \pm 0.009$ |



**Table SI 7** Average observed rate constants,  $k_{\text{obs2}}$ , for the reaction of 0.125 mM **Pt(mtp)** with different **tu** concentrations at different temperatures and pH 2 ( $I = 0.01$  M triflic acid).

| T in K     | 288.15                                    | 298.15            | 308.15            | 318.15            |
|------------|-------------------------------------------|-------------------|-------------------|-------------------|
| [tu] in mM | $10^2 k_{\text{obs2}}$ in $\text{s}^{-1}$ |                   |                   |                   |
| 5.00       | $0.146 \pm 0.005$                         | $0.18 \pm 0.03$   | $0.237 \pm 0.008$ | $0.290 \pm 0.006$ |
| 10.00      | $0.636 \pm 0.007$                         | $0.802 \pm 0.009$ | $0.92 \pm 0.04$   | $1.124 \pm 0.009$ |
| 15.00      | $1.408 \pm 0.008$                         | $1.724 \pm 0.005$ | $2.07 \pm 0.03$   | $2.45 \pm 0.02$   |
| 20.00      | $2.40 \pm 0.01$                           | $2.919 \pm 0.003$ | $3.71 \pm 0.07$   | $4.37 \pm 0.02$   |
| 25.00      | $3.82 \pm 0.05$                           | $4.608 \pm 0.005$ | $5.71 \pm 0.03$   | $6.84 \pm 0.01$   |

**Table SI 8** Average observed rate constants,  $k_{\text{obs}2}$ , for the reaction of 0.125 mM **Pt(mtp)** with different **dmtu** concentrations at different temperatures and pH 2 ( $I = 0.01$  M triflic acid).

| T in K       | 288.15                                    | 298.15            | 308.15            | 318.15            |
|--------------|-------------------------------------------|-------------------|-------------------|-------------------|
| [dmtu] in mM | $10^2 k_{\text{obs}2}$ in $\text{s}^{-1}$ |                   |                   |                   |
| 5.00         | $0.053 \pm 0.005$                         | $0.064 \pm 0.006$ | $0.079 \pm 0.008$ | $0.092 \pm 0.006$ |
| 10.00        | $0.193 \pm 0.007$                         | $0.230 \pm 0.002$ | $0.293 \pm 0.04$  | $0.361 \pm 0.005$ |
| 15.00        | $0.42 \pm 0.04$                           | $0.516 \pm 0.003$ | $0.641 \pm 0.03$  | $0.81 \pm 0.01$   |
| 20.00        | $0.718 \pm 0.006$                         | $0.886 \pm 0.005$ | $1.140 \pm 0.07$  | $1.41 \pm 0.02$   |
| 25.00        | $1.385 \pm 0.009$                         | $1.385 \pm 0.002$ | $1.769 \pm 0.03$  | $2.161 \pm 0.009$ |

**Table SI 9** Average observed rate constants,  $k_{\text{obs}2}$ , for the reaction of 0.125 mM **Pt(mtp)** with different **tmtu** concentrations at different temperatures and pH 2 ( $I = 0.01$  M triflic acid).

| T in K       | 288.15                                    | 298.15            | 308.15            | 318.15            |
|--------------|-------------------------------------------|-------------------|-------------------|-------------------|
| [tmtu] in mM | $10^2 k_{\text{obs}2}$ in $\text{s}^{-1}$ |                   |                   |                   |
| 5.00         | $0.006 \pm 0.0001$                        | $0.013 \pm 0.007$ | $0.015 \pm 0.008$ | $0.022 \pm 0.006$ |
| 10.00        | $0.027 \pm 0.007$                         | $0.041 \pm 0.004$ | $0.056 \pm 0.004$ | $0.077 \pm 0.005$ |
| 15.00        | $0.063 \pm 0.004$                         | $0.086 \pm 0.006$ | $0.12 \pm 0.01$   | $0.168 \pm 0.006$ |
| 20.00        | $0.106 \pm 0.006$                         | $0.16 \pm 0.01$   | $0.225 \pm 0.007$ | $0.301 \pm 0.008$ |
| 25.00        | $0.167 \pm 0.009$                         | $0.240 \pm 0.005$ | $0.35 \pm 0.01$   | $0.47 \pm 0.01$   |

**Table SI 10** Summary of the third-order rate constants,  $k_3K_2$ , for the reaction of 0.125 mM **Pt(mtp)** with different nucleophiles at different temperatures and pH 2 ( $I = 0.01$  M triflic acid).

| Nucleophile | <b>tu</b>                   | <b>dmtu</b>    | <b>tmtu</b>     |
|-------------|-----------------------------|----------------|-----------------|
| T in K      | $k_3K_2$ in $M^{-2} s^{-1}$ |                |                 |
| 288.15      | $60.9 \pm 0.1$              | $17.6 \pm 0.1$ | $2.87 \pm 0.08$ |
| 298.15      | $73.3 \pm 0.4$              | $22.1 \pm 0.4$ | $3.82 \pm 0.04$ |
| 308.15      | $91.5 \pm 0.2$              | $28.2 \pm 0.3$ | $4.84 \pm 0.06$ |
| 318.15      | $109.1 \pm 0.1$             | $34.6 \pm 0.1$ | $6.2 \pm 0.1$   |

**Table SI 11** Average observed rate constants,  $k_{\text{obs4}}$ , for the reaction of 0.125 mM **Pt(mtp)** with different **tu** concentrations at different temperatures and pH 4.75 ( $I = 0.1$  M acetate buffer).

| T in K     | 288.15                               | 298.15            | 308.15            | 318.15            |
|------------|--------------------------------------|-------------------|-------------------|-------------------|
| [tu] in mM | $k_{\text{obs4}}$ in $\text{s}^{-1}$ |                   |                   |                   |
| 1.25       | $0.151 \pm 0.01$                     | $0.249 \pm 0.003$ | $0.43 \pm 0.01$   | $0.739 \pm 0.006$ |
| 2.50       | $0.232 \pm 0.007$                    | $0.36 \pm 0.01$   | $0.633 \pm 0.004$ | $1.01 \pm 0.02$   |
| 3.75       | $0.296 \pm 0.004$                    | $0.495 \pm 0.004$ | $0.84 \pm 0.01$   | $1.29 \pm 0.01$   |
| 5.00       | $0.383 \pm 0.006$                    | $0.636 \pm 0.007$ | $1.051 \pm 0.007$ | $1.60 \pm 0.008$  |
| 6.25       | $0.469 \pm 0.009$                    | $0.755 \pm 0.002$ | $1.28 \pm 0.01$   | $1.92 \pm 0.03$   |

**Table SI 12** Average observed rate constants,  $k_{\text{obs4}}$ , for the reaction of 0.125 mM **Pt(mtp)** with different **dmtu** concentrations at different temperatures and pH 4.75 ( $I = 0.1$  M acetate buffer).

| T in K       | <b>288.15</b>                        | <b>298.15</b>     | <b>308.15</b>     | <b>318.15</b>     |
|--------------|--------------------------------------|-------------------|-------------------|-------------------|
| [dmtu] in mM | $k_{\text{obs4}}$ in $\text{s}^{-1}$ |                   |                   |                   |
| 1.25         | $0.092 \pm 0.005$                    | $0.18 \pm 0.02$   | $0.308 \pm 0.008$ | $0.555 \pm 0.003$ |
| 2.50         | $0.151 \pm 0.002$                    | $0.263 \pm 0.002$ | $0.44 \pm 0.01$   | $0.748 \pm 0.009$ |
| 3.75         | $0.21 \pm 0.01$                      | $0.353 \pm 0.005$ | $0.572 \pm 0.009$ | $0.974 \pm 0.002$ |
| 5.00         | $0.274 \pm 0.002$                    | $0.442 \pm 0.005$ | $0.72 \pm 0.02$   | $1.15 \pm 0.01$   |
| 6.25         | $0.331 \pm 0.006$                    | $0.53 \pm 0.01$   | $0.83 \pm 0.01$   | $1.41 \pm 0.01$   |

**Table SI 13** Average observed rate constants,  $k_{\text{obs4}}$ , for the reaction of 0.125 mM **Pt(mtp)** with different **tmtu** concentrations at different temperatures and pH 4.75 ( $I = 0.1$  M acetate buffer).

| T in K       | 288.15                               | 298.15            | 308.15            | 318.15            |
|--------------|--------------------------------------|-------------------|-------------------|-------------------|
| [tmtu] in mM | $k_{\text{obs4}}$ in $\text{s}^{-1}$ |                   |                   |                   |
| 1.25         | $0.036 \pm 0.003$                    | $0.089 \pm 0.006$ | $0.165 \pm 0.004$ | $0.30 \pm 0.03$   |
| 2.50         | $0.049 \pm 0.002$                    | $0.102 \pm 0.008$ | $0.194 \pm 0.004$ | $0.35 \pm 0.01$   |
| 3.75         | $0.060 \pm 0.008$                    | $0.122 \pm 0.002$ | $0.227 \pm 0.08$  | $0.41 \pm 0.01$   |
| 5.00         | $0.070 \pm 0.003$                    | $0.140 \pm 0.002$ | $0.26 \pm 0.001$  | $0.455 \pm 0.008$ |
| 6.25         | $0.081 \pm 0.003$                    | $0.16 \pm 0.01$   | $0.283 \pm 0.009$ | $0.505 \pm 0.005$ |

**Table SI 14** Summary of the second-order rate constants,  $k_4$ , for the reaction of 0.125 mM **Pt(mtp)** with different nucleophiles at different temperatures and pH 4.75 ( $I = 0.1$  M acetate buffer).

| Nucleophile | <b>tu</b>                              | <b>dmtu</b>    | <b>tmtu</b>    |
|-------------|----------------------------------------|----------------|----------------|
| T in K      | $k_4$ in $\text{M}^{-1} \text{s}^{-1}$ |                |                |
| 288.15      | $69.7 \pm 0.6$                         | $48.0 \pm 0.4$ | $8.8 \pm 0.2$  |
| 298.15      | $106 \pm 2$                            | $70 \pm 1$     | $14.1 \pm 0.5$ |
| 308.15      | $164 \pm 5$                            | $107 \pm 2$    | $23.9 \pm 0.5$ |
| 318.15      | $260 \pm 7$                            | $169 \pm 5$    | $41 \pm 1$     |



**Table SI 15** Average observed rate constants,  $k_{\text{obs5}}$ , for the reaction of 0.125 mM **Pt(mtp)** with different nucleophiles (3.75 mM) at different temperatures and pH 4.75 ( $I = 0.1$  M acetate buffer).

| Nucleophile | <b>tu</b>                                 | <b>dmtu</b>     | <b>tmtu</b>       |
|-------------|-------------------------------------------|-----------------|-------------------|
| T in K      | $10^2 k_{\text{obs5}}$ in $\text{s}^{-1}$ |                 |                   |
| 288.15      | $0.38 \pm 0.01$                           | $0.23 \pm 0.02$ | $0.155 \pm 0.005$ |
| 298.15      | $0.70 \pm 0.01$                           | $0.41 \pm 0.01$ | $0.262 \pm 0.004$ |
| 308.15      | $1.13 \pm 0.03$                           | $0.72 \pm 0.02$ | $0.55 \pm 0.01$   |
| 318.15      | $1.79 \pm 0.02$                           | $1.15 \pm 0.05$ | $0.102 \pm 0.002$ |

**Table SI 16** Average observed rate constants,  $k_{\text{obs1}}$ , for the reaction of 0.125 mM **Pt(mtp)** with different nucleophiles (5 mM) at different pressures, 25°C and pH 2 ( $I = 0.01$  M triflic acid).

| Nucleophile | <b>tu</b>                            | <b>dmtu</b>   | <b>tmtu</b>   |
|-------------|--------------------------------------|---------------|---------------|
| p in MPa    | $k_{\text{obs1}}$ in s <sup>-1</sup> |               |               |
| 10          | 2.78 ± 0.01                          | 2.42 ± 0.02   | 0.789 ± 0.009 |
| 50          | 3.056 ± 0.008                        | 2.753 ± 0.009 | 1.004 ± 0.006 |
| 90          | 3.32 ± 0.01                          | 3.08 ± 0.01   | 1.25 ± 0.02   |
| 130         | 3.58 ± 0.02                          | 3.48 ± 0.02   | 1.556 ± 0.007 |

**Table SI 17** Average observed rate constants,  $k_{\text{obs4}}$ , for the reaction of 0.125 mM **Pt(mtp)** with different nucleophiles (2.5 mM) at different pressures, 25°C and pH 4.75 ( $I = 0.1$  M acetate buffer).

| Nucleophile | <b>tu</b>                            | <b>dmtu</b>       | <b>tmtu</b>       |
|-------------|--------------------------------------|-------------------|-------------------|
| p in MPa    | $k_{\text{obs4}}$ in $\text{s}^{-1}$ |                   |                   |
| 10          | $0.35 \pm 0.01$                      | $0.23 \pm 0.01$   | $0.094 \pm 0.007$ |
| 50          | $0.41 \pm 0.01$                      | $0.298 \pm 0.009$ | $0.11 \pm 0.02$   |
| 90          | $0.45 \pm 0.02$                      | $0.37 \pm 0.01$   | $0.14 \pm 0.01$   |
| 130         | $0.49 \pm 0.01$                      | $0.42 \pm 0.01$   | $0.17 \pm 0.02$   |

**Table SI 18** Average observed rate constants,  $k_{\text{obs4}}$ , for the reaction of 0.125 mM **Pt(mtp)** with different nucleophiles (5 mM) at different pressures, 25°C and pH 4.75 ( $I = 0.1$  M acetate buffer).

| Nucleophile | <b>tu</b>                            | <b>dmtu</b>     | <b>tmtu</b>       |
|-------------|--------------------------------------|-----------------|-------------------|
| p in MPa    | $k_{\text{obs4}}$ in $\text{s}^{-1}$ |                 |                   |
| 10          | $0.67 \pm 0.01$                      | $0.42 \pm 0.01$ | $0.14 \pm 0.01$   |
| 50          | $0.798 \pm 0.008$                    | $0.57 \pm 0.02$ | $0.18 \pm 0.02$   |
| 90          | $0.95 \pm 0.01$                      | $0.65 \pm 0.04$ | $0.22 \pm 0.01$   |
| 130         | $1.05 \pm 0.02$                      | $0.77 \pm 0.02$ | $0.275 \pm 0.006$ |

**Table SI 19** Average observed rate constants,  $k_{\text{obs4}}$ , for the reaction of 0.125 mM **Pt(mtp)** with different nucleophiles (7.5 mM) at different pressures, 25°C and pH 4.75 ( $I = 0.1$  M acetate buffer).

| Nucleophile | <b>tu</b>                            | <b>dmtu</b>       | <b>tmtu</b>       |
|-------------|--------------------------------------|-------------------|-------------------|
| p in MPa    | $k_{\text{obs4}}$ in $\text{s}^{-1}$ |                   |                   |
| 10          | $0.943 \pm 0.007$                    | $0.659 \pm 0.006$ | $0.192 \pm 0.006$ |
| 50          | $1.14 \pm 0.01$                      | $0.811 \pm 0.009$ | $0.24 \pm 0.01$   |
| 90          | $1.33 \pm 0.01$                      | $0.97 \pm 0.01$   | $0.298 \pm 0.004$ |
| 130         | $1.547 \pm 0.009$                    | $1.13 \pm 0.02$   | $0.37 \pm 0.01$   |

**Table SI 20** Summary of the second-order rate constants,  $k_4$ , for the reaction of 0.125 mM **Pt(mtp)** with different nucleophiles at different pressures and pH 4.75 ( $I = 0.1$  M acetate buffer).

| Nucleophile | <b>tu</b>                | <b>dmtu</b> | <b>tmtu</b>    |
|-------------|--------------------------|-------------|----------------|
| p in MPa    | $k_4$ in $M^{-1} s^{-1}$ |             |                |
| 10          | $121 \pm 3$              | $86 \pm 2$  | $20 \pm 1$     |
| 50          | $146 \pm 6$              | $103 \pm 4$ | $25.2 \pm 0.4$ |
| 90          | $175 \pm 5$              | $121 \pm 4$ | $32.1 \pm 0.3$ |
| 130         | $208 \pm 6$              | $142 \pm 1$ | $41 \pm 1$     |
